# Supplementary material
Source: publisher site journal article supplement (https://www.dovepress.com/article/422903)
Supplement: Supplementary file 1 [file get_supplementary_file.php]

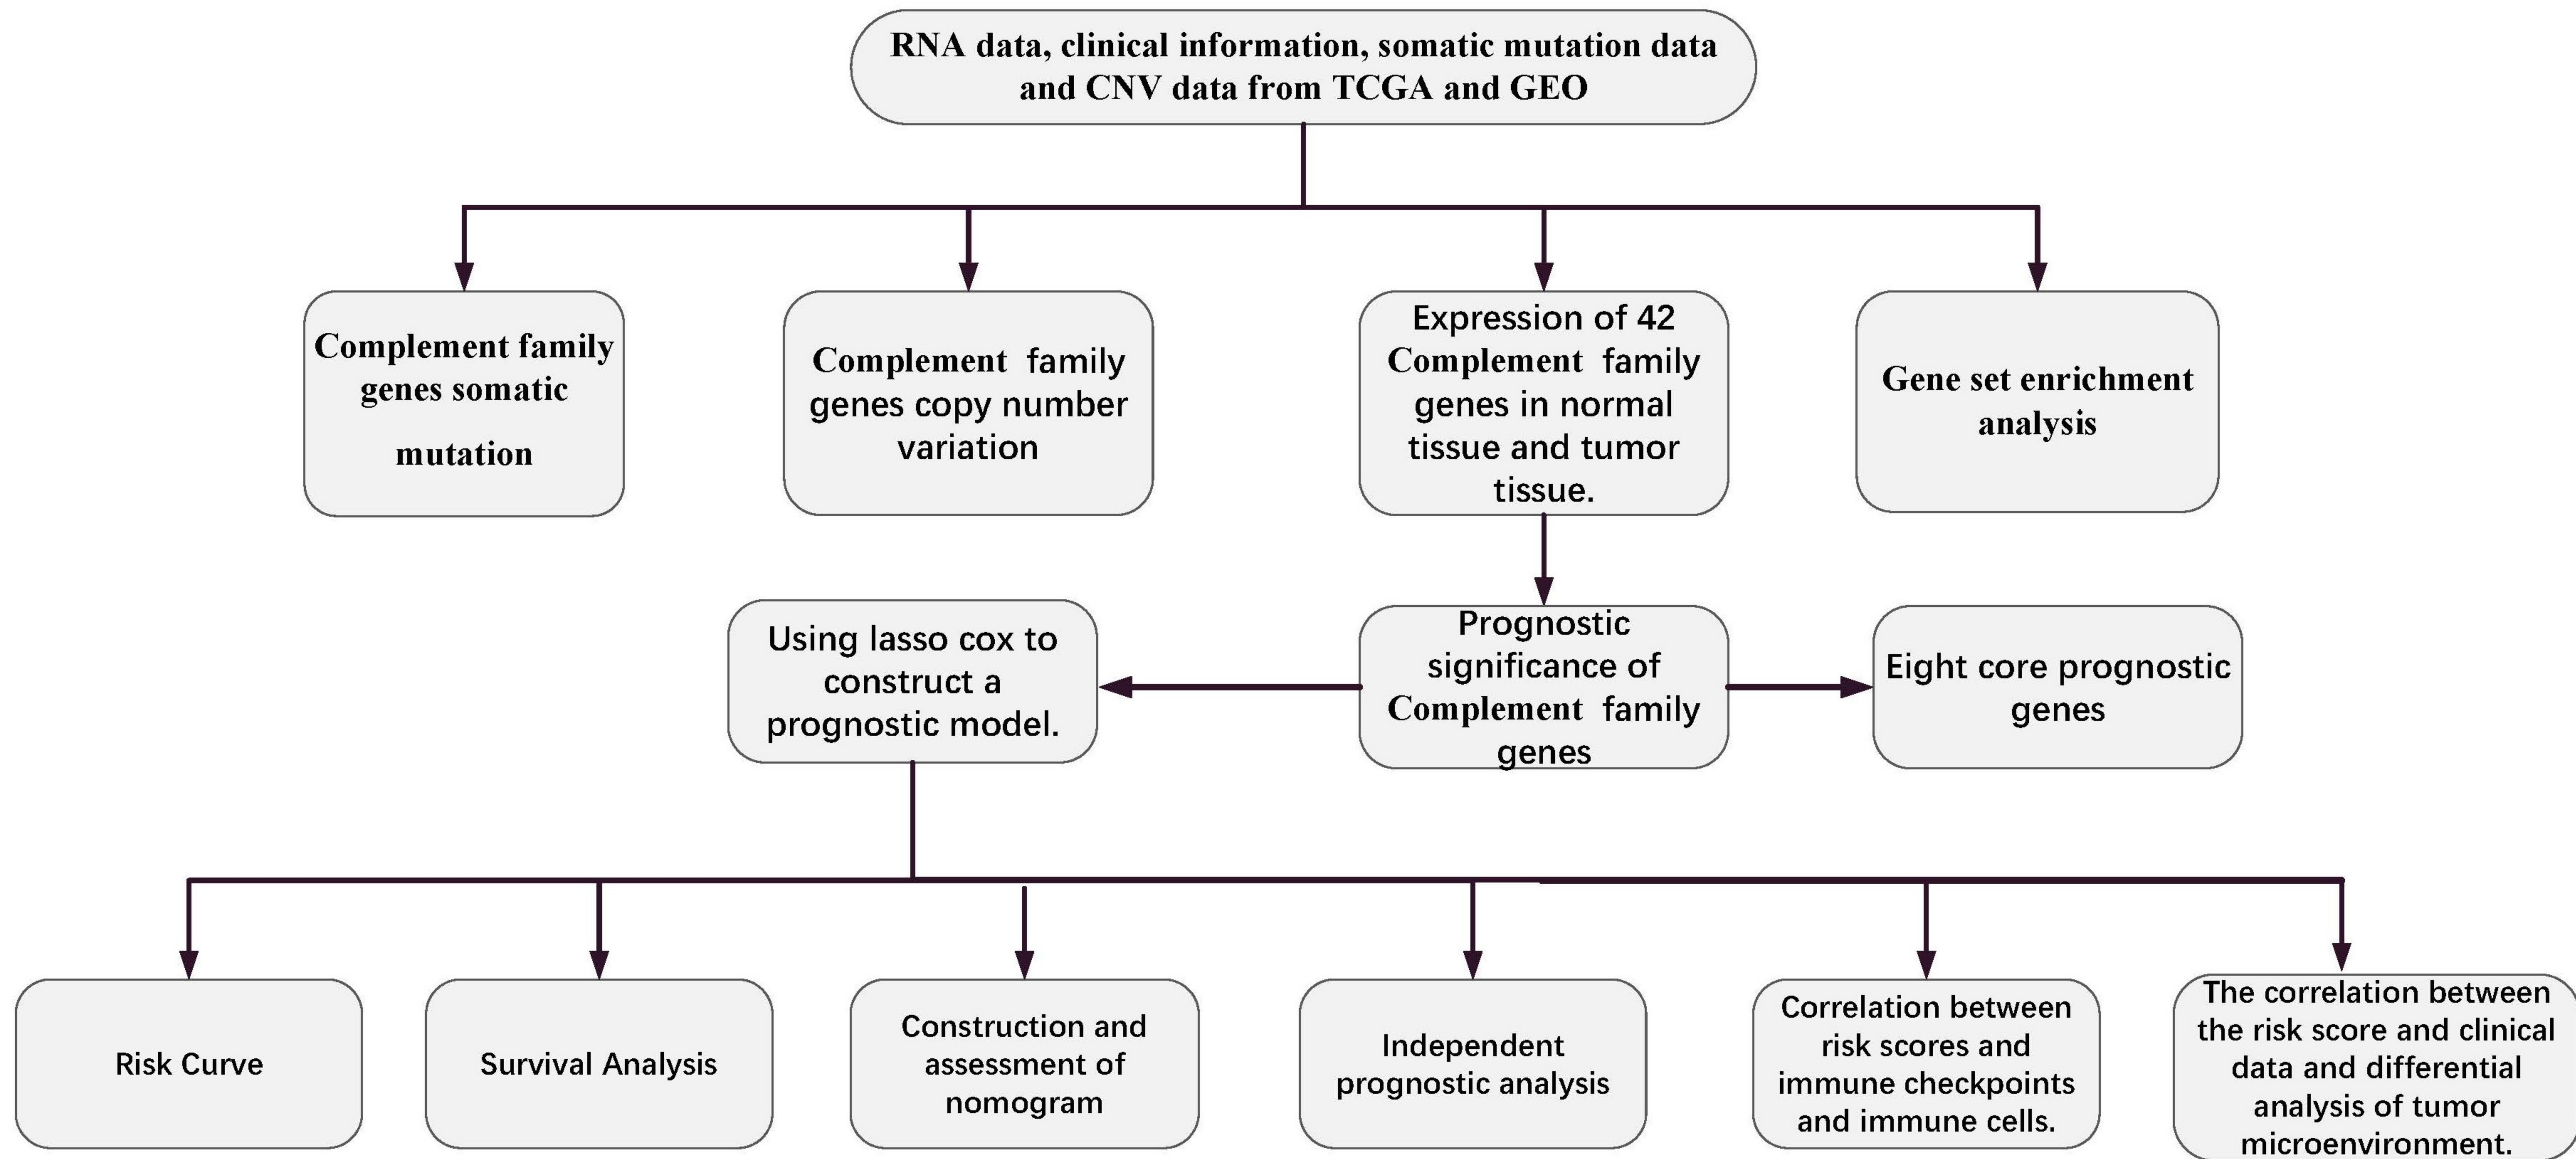

**Supplementary Figure 1: Supplementary Figure 1 shows the flow chart of our study design.**

| Gene  | Remarks                                           |
|-------|---------------------------------------------------|
| C1qR  | component C1q receptor                            |
| C1QA  | Complement C1q A chain                            |
| C1QB  | Complement C1q B chain                            |
| C1QBP | Complement C1q binding protein                    |
| C1QC  | Complement C1q C chain                            |
| C1R   | Complement C1r                                    |
| C1RL  | Complement C1r subcomponent like                  |
| C1S   | Complement C1s                                    |
| C2    | Complement C2                                     |
| C3    | Complement C3                                     |
| C3AR1 | Complement C3a receptor 1                         |
| C3d   | Complement C3d                                    |
| C4A   | Complement C4A (Chido blood group)                |
| C4B   | Complement C4B (Chido blood group)                |
| C4BPA | Complement component 4 binding protein alpha      |
| C4BPB | Complement component 4 binding protein beta       |
| C5    | Complement C5                                     |
| C5AR1 | Complement C5a receptor 1                         |
| C5AR2 | Complement C5a receptor 2                         |
| C6    | Complement C6                                     |
| C7    | Complement C7                                     |
| C8A   | Complement C8 alpha chain                         |
| C8B   | Complement C8 beta chain                          |
| C8G   | Complement C8 gamma chain                         |
| C9    | Complement C9                                     |
| CD209 | CD209 molecule                                    |
| CD46  | CD46 molecule                                     |
| CD55  | CD55 molecule (Cromer blood group)                |
| CD59  | CD59 molecule (CD59 blood group)                  |
| CD93  | CD93 molecule                                     |
| CFB   | Complement factor B                               |
| CFD   | Complement factor D                               |
| CFH   | Complement factor H                               |
| CFHR1 | Complement factor H related 1                     |
| CFHR2 | Complement factor H related 2                     |
| CFHR4 | Complement factor H related 4                     |
| CFHR5 | Complement factor H related 5                     |
| CFI   | Complement factor I                               |
| CFP   | Complement factor properdin                       |
| CLU   | Clusterin                                         |
| CPN1  | Carboxypeptidase N subunit 1                      |
| CR1   | Complement C3b/C4b receptor 1 (Knops blood group) |
| CR2   | Complement C3d receptor 2                         |
| CR3   | CD11b / CD18                                      |
| CR4   | CD11c / CD18                                      |
| FHR2  | Complement factor H related 2                     |
| FHR3  | Complement factor H related 3                     |
| FHR4  | Complement factor H related 4                     |
| FHR5  | Complement factor H related 5                     |
| MASP1 | MBL associated serine protease 1                  |
| MASP2 | MBL associated serine protease 2                  |
| VTN   | Vitronectin                                       |

**Supplementary Table 1: 53 complement-related genes**
